# Supplementary material
Source: Springer Nature journal article supplement (https://www.springermedizin.de/resource/supplementary/12974_2013_980_MOESM1_ESM.pdf/9600566)
Supplement: MOESM1 [file 9600566]

**Additional file 1: Table S1. Primer Sequences**

| <b>Gene</b>   | <b>Primer Sequences (5' – 3')</b> |                                 |
|---------------|-----------------------------------|---------------------------------|
| <b>Symbol</b> |                                   |                                 |
| <b>Ctsc</b>   | Forward                           | AGG CCA CAC AGC TAT CAG TT      |
|               | Reverse                           | TTG CCA ACA AAG CAA GCC CA      |
| <b>Cxcl10</b> | Forward                           | GCT CAA GTG GCT GGG ATG         |
|               | Reverse                           | GAG GAC AAG GAG GGT GTG G       |
| <b>Gbp2</b>   | Forward                           | CCA AGC GAG ATG CCT TTA TC      |
|               | Reverse                           | TTC TTC TTC CAG GGG TCC A       |
| <b>Gbp3</b>   | Forward                           | TGC TTT GTC TTT GAC AGG CCC A   |
|               | Reverse                           | TCT TGG TCT TGC CGT TGG TGA A   |
| <b>Gbp4</b>   | Forward                           | CCT CTT CCT CTT TCT TCT TCC TTT |
|               | Reverse                           | GTG TTT CTA TGG GGG TGT GG      |
| <b>Ifit1</b>  | Forward                           | GAC AAG GCA ATC ACC CTC TAC T   |
|               | Reverse                           | TCT TTC AGC CAC TTT CTC CAA     |
| <b>Ifitm3</b> | Forward                           | CGC TCC ATC CTT TGC CCT TCA GTG |
|               | Reverse                           | GCC CCC ATC TCA GCC ACC TCA T   |
| <b>Il1b</b>   | Forward                           | CGC TCA GGG TCA CAA GAA AC      |
|               | Reverse                           | GAG GCA AGG AGG AAA ACA CA      |
| <b>Il6</b>    | Forward                           | TTC CAT CCA GTT GCC TTC TT      |
|               | Reverse                           | ATT TCC ACG ATT TCC CAG AG      |
| <b>Irgm1</b>  | Forward                           | AGT TCA GCA GGT AGC CCA GA      |
|               | Reverse                           | TCA GCC TCA GTT TCC AGT CC      |
| <b>Irf7</b>   | Forward                           | GAA GAG GCT GGA AGA CCA ACT     |
|               | Reverse                           | AGA TAA AAC GCC CTG TGC TG      |

|                 |         |                                |
|-----------------|---------|--------------------------------|
| <b>Lgals3bp</b> | Forward | ATT CCT GTG TCC CCT CCT TC     |
|                 | Reverse | GTG AGT GCT GGC TGA AAC CT     |
| <b>Oasl2</b>    | Forward | AGC GAG CGA GGG ATG TTC AGG T  |
|                 | Reverse | TGG GGC TGT AGG GGT TTG TCC AG |
| <b>Rtp4</b>     | Forward | GCA TCT TTG GGT GAG AAG GT     |
|                 | Reverse | ATG GGG AGG AAC TCT TTG GT     |
| <b>Sp100</b>    | Forward | CAT CAT TTT CCT TGG CTG GT     |
|                 | Reverse | CAT TTT GGT TGG TCC TTG CT     |
| <b>Stat1</b>    | Forward | GAA AAA CGC TGG GAA CAG AA     |
|                 | Reverse | CGA CAG GAA GAG AGG TGG TC     |
| <b>Tbp</b>      | Forward | TGC TGT TGG TGA TTG TTG GT     |
|                 | Reverse | AAC TGG CTT GTG TGG GAA AG     |
| <b>Tnfa</b>     | Forward | CAC CAC CAT CAA GGA CTC AA     |
|                 | Reverse | GAG GCA ACC TGA CCA CTC TC     |

---
